# Supplementary material for: The Effect of Vitamin D Supplementation in Pregnant Women with Overweight and Obesity: A Randomised Controlled Trial
Source: MDPI journal article supplement (doi:10.3390/nu16010146), 2023-12-31
Supplement: s1 [file s1]

**Table S1.** Comparisons of plasma lipid and glycaemic profiles between groups in subsample women with vitamin D insufficiency at both baseline and 24-28 weeks gestation (n=54).

| Variable                                 | Control (n=37) | Intervention (n=17) | Adjusted difference<br>(95% CI) | p <sup>b</sup> |
|------------------------------------------|----------------|---------------------|---------------------------------|----------------|
| Total cholesterol, mean (SD), mmol/L     | 6.28 (1.12)    | 6.15 (1.33)         | -0.05 (-0.47, 0.38)             | 0.829          |
| HDL-cholesterol, mean (SD), mmol/L       | 1.82 (0.39)    | 1.53 (0.23)         | -0.17 (-0.30, -0.04)            | 0.012          |
| LDL-cholesterol, mean (SD), mmol/L       | 3.41 (0.94)    | 3.35 (1.43)         | -0.15 (-0.60, 0.29)             | 0.485          |
| Triglyceride, mean (SD), mmol/L          | 2.39 (0.77)    | 2.67 (1.03)         | 0.27 (-0.11, 0.66)              | 0.164          |
| Fasting glucose, mean (SD), mmol/L       | 4.46 (0.43)    | 4.61 (0.61)         | 0.15 (-0.15, 0.45)              | 0.321          |
| 1-hour glucose, mean (SD), mmol/L        | 7.91 (1.61)    | 7.88 (1.86)         | -0.03 (-1.07, 1.00)             | 0.948          |
| 2-hour glucose, mean (SD), mmol/L        | 6.52 (1.14)    | 6.48 (1.51)         | -0.04 (-0.81, 0.73)             | 0.918          |
| Gestational diabetes, n (%) <sup>a</sup> |                |                     |                                 | 0.915          |
| No                                       | 28 (77.8)      | 13 (76.5)           | NA                              |                |
| Yes                                      | 8 (22.2)       | 4 (23.5)            | NA                              |                |

<sup>a</sup>One participant from the control group declined oral glucose tolerance test.

<sup>b</sup>P-values were determined from the analysis of covariance test, adjusting for baseline values and duration of intervention, except for glycaemic measures which were only adjusted for intervention duration.

NA, Not applicable.

**Table S2.** Comparisons of plasma Vitamin D, lipid and glycaemic profiles between trial groups at 24-28 weeks gestation, stratified by overweight and obesity status.

| Variable                                 | Overweight (25–29.9 kg/m <sup>2</sup> ) |                        |                                 |                | Obese (≥ 30.0 kg/m <sup>2</sup> ) |                        |                                 |                |
|------------------------------------------|-----------------------------------------|------------------------|---------------------------------|----------------|-----------------------------------|------------------------|---------------------------------|----------------|
|                                          | Control<br>(n=72)                       | Intervention<br>(n=61) | Adjusted<br>difference (95% CI) | p <sup>b</sup> | Control<br>(n=47)                 | Intervention<br>(n=51) | Adjusted<br>difference (95% CI) | p <sup>b</sup> |
| Vitamin D, mean (SD), nmol/L             | 53.59 (17.49)                           | 62.20 (15.80)          | 6.33 (1.22, 11.43)              | 0.016          | 53.26 (14.19)                     | 60.56 (17.92)          | 7.00 (1.13, 12.87)              | 0.020          |
| Deficiency <25 nmol/L, n (%)             | 2 (2.8)                                 | 0 (0.0)                | NA                              | NA             | 1 (2.1)                           | 0 (0.0)                | NA                              | NA             |
| Insufficiency 25 to <50 nmol/L, n (%)    | 31 (43.1)                               | 11 (18.0)              | NA                              | NA             | 19 (40.4)                         | 14 (27.5)              | NA                              | NA             |
| Sufficiency ≥50 nmol/L, n (%)            | 39 (54.2)                               | 50 (82.0)              | NA                              | NA             | 27 (57.4)                         | 37 (72.5)              | NA                              | NA             |
| Total cholesterol, mean (SD), mmol/L     | 6.30 (0.96)                             | 6.29 (1.14)            | -0.19 (-0.43, -0.07)            | 0.164          | 5.81 (1.05)                       | 5.94 (0.97)            | 0.14 (0.10, 0.38)               | 0.240          |
| HDL-cholesterol, mean (SD), mmol/L       | 1.82 (0.38)                             | 1.87 (0.35)            | 0.04 (0.04, 0.13)               | 0.333          | 1.77 (0.31)                       | 1.75 (0.34)            | -0.01 (-0.09, -0.08)            | 0.902          |
| LDL-cholesterol, mean (SD), mmol/L       | 3.45 (0.86)                             | 3.39 (1.00)            | -0.07 (-0.33, -0.19)            | 0.578          | 3.06 (0.83)                       | 3.20 (0.89)            | 0.16 (0.13, 0.44)               | 0.278          |
| Triglyceride, mean (SD), mmol/L          | 2.26 (0.83)                             | 2.24 (0.88)            | -0.12 (-0.37, -0.14)            | 0.369          | 2.20 (0.82)                       | 2.12 (0.69)            | -0.09 (-0.37, -0.18)            | 0.508          |
| Fasting glucose, mean (SD), mmol/L       | 4.36 (0.37)                             | 4.32 (0.37)            | -0.04 (-0.17, -0.09)            | 0.066          | 4.68 (1.07)                       | 4.56 (0.55)            | -0.12 (-0.46, -0.23)            | 0.505          |
| 1-hour glucose, mean (SD), mmol/L        | 7.88 (1.55)                             | 7.63 (1.49)            | -0.27 (-0.81, -0.27)            | 0.325          | 8.56 (2.62)                       | 8.33 (1.97)            | -0.20 (-1.15, -0.76)            | 0.687          |
| 2-hour glucose, mean (SD), mmol/L        | 6.37 (1.45)                             | 6.67 (1.30)            | 0.29 (0.19, 0.78)               | 0.234          | 6.85 (2.15)                       | 6.71 (1.53)            | -0.07 (-0.83, -0.68)            | 0.848          |
| Gestational diabetes, n (%) <sup>a</sup> |                                         |                        |                                 |                |                                   |                        |                                 |                |
| No                                       | 58 (82.9)                               | 49 (83.1)              | NA                              | NA             | 36 (76.6)                         | 35 (70.0)              | NA                              | NA             |
| Yes                                      | 12 (17.1)                               | 10 (16.9)              | NA                              | NA             | 11 (23.4)                         | 15 (30.0)              | NA                              | NA             |

<sup>a</sup>Five participants declined oral glucose tolerance test (Control: two, Intervention: three).

<sup>b</sup>P-values were determined from the analysis of covariance test, adjusting for baseline values and duration of intervention, except for glycaemic measures which were only adjusted for intervention duration.

NA, Not applicable.

**Table S3.** Comparisons of maternal and birth outcomes between trial groups at delivery, stratified by overweight and obesity status.

| Variable                                          | Overweight (25–29.9 kg/m <sup>2</sup> ) |                     |        | Obese (≥ 30.0 kg/m <sup>2</sup> ) |                     |        |
|---------------------------------------------------|-----------------------------------------|---------------------|--------|-----------------------------------|---------------------|--------|
|                                                   | Control (n=69)                          | Intervention (n=60) | p      | Control (n=47)                    | Intervention (n=51) | p      |
| Neonatal birth weight, mean (SD), g               | 3128.80 (416.74)                        | 3089.70 (450.31)    | 0.610  | 3113.57 (462.71)                  | 3264.53 (412.83)    | 0.091  |
| Low birth weight, n (%)                           |                                         |                     | 0.158  |                                   |                     | 0.032  |
| Yes                                               | 5 (7.2)                                 | 9 (15.0)            |        | 8 (17.0)                          | 2 (3.9)             |        |
| No                                                | 64 (92.8)                               | 51 (85.0)           |        | 39 (83.0)                         | 49 (96.1)           |        |
| Neonatal birth length, mean (SD), cm              | 48.39 (1.84)                            | 48.40 (2.07)        | >0.950 | 48.06 (2.55)                      | 49.06 (1.68)        | 0.024  |
| Neonatal head circumference, mean (SD), cm        | 33.64 (1.32)                            | 33.76 (1.45)        | 0.622  | 33.82 (1.32)                      | 34.13 (1.40)        | 0.266  |
| Neonatal status, n (%)                            |                                         |                     | 0.187  |                                   |                     | 0.102  |
| Healthy live birth                                | 66 (95.7)                               | 53 (88.3)           |        | 42 (89.4)                         | 50 (98.0)           |        |
| Special care unit admission                       | 3 (4.3)                                 | 7 (11.7)            |        | 5 (10.6)                          | 1 (2.0)             |        |
| Preterm birth, n (%)                              |                                         |                     | 0.663  |                                   |                     | 0.717  |
| No                                                | 67 (97.1)                               | 57 (95.0)           |        | 44 (93.6)                         | 46 (90.2)           |        |
| Yes                                               | 2 (2.9)                                 | 3 (5.0)             |        | 3 (6.4)                           | 5 (9.8)             |        |
| Gestational hypertension, n (%) <sup>a</sup>      |                                         |                     |        |                                   |                     | 0.423  |
| No                                                | 66 (95.7)                               | 58 (96.7)           | >0.950 | 43 (91.5)                         | 49 (96.1)           |        |
| Yes                                               | 3 (4.3)                                 | 2 (3.3)             |        | 4 (8.5)                           | 2 (3.9)             |        |
| Total gestational weight gain, n (%) <sup>b</sup> |                                         |                     | 0.219  |                                   |                     | 0.542  |
| Adequacy                                          | 24 (36.4)                               | 28 (48.3)           |        | 15 (32.6)                         | 20 (40.8)           |        |
| Insufficiency                                     | 15 (22.7)                               | 7 (12.1)            |        | 10 (21.7)                         | 12 (24.5)           |        |
| Excessive                                         | 27 (40.9)                               | 23 (39.7)           |        | 21 (45.7)                         | 17 (34.7)           |        |
| Mode of delivery, n (%)                           |                                         |                     | 0.776  |                                   |                     | >0.950 |
| Normal vaginal delivery                           | 41 (59.4)                               | 38 (63.3)           |        | 28 (59.6)                         | 30 (59.2)           |        |
| Instrumental (forceps/vacuum) vaginal delivery    | 9 (13.0)                                | 5 (8.3)             |        | 2 (4.3)                           | 2 (3.9)             |        |
| Elective caesarean section delivery               | 6 (8.7)                                 | 7 (11.7)            |        | 6 (12.8)                          | 8 (15.7)            |        |
| Emergency caesarean section delivery              | 13 (18.8)                               | 10 (16.7)           |        | 11 (23.4)                         | 11 (21.6)           |        |

P-values were determined from the independent t-test for continuous variables and chi-square test for categorical variables.

<sup>a</sup>The numbers of participants with gestational hypertension and pre-eclampsia are four and seven respectively.

<sup>b</sup>Total number is not equal to 227 due to missing data.

**Table S4.** Comparisons of plasma vitamin D and lipid levels between groups at 24-28 weeks' gestation with ≥80% compliance.

|                                             | Control<br>(n=119) | Intervention<br>(n=112) | Mean difference<br>(95% CI) | p      | Adjusted difference<br>(95% CI) <sup>a</sup> | P      |
|---------------------------------------------|--------------------|-------------------------|-----------------------------|--------|----------------------------------------------|--------|
| Vitamin D, nmol/L                           | 53.46 ± 16.20      | 61.45 ± 16.74           | 8.00 (3.72, 12.27)          | <0.001 | 6.52 (2.74, 10.31)                           | 0.001  |
| Severe deficiency<br><25 nmol/L, n (%)      | 3 (2.5)            | 0 (0.0)                 |                             | <0.001 |                                              |        |
| Deficiency 25 to <50<br>nmol/L, n (%)       | 50 (42.0)          | 25 (22.3)               |                             |        |                                              |        |
| Sufficiency ≥50<br>nmol/L, n (%)            | 66 (55.5)          | 87 (77.7)               |                             |        |                                              |        |
| Total cholesterol,<br>mmol/L                | 6.11 ± 1.02        | 6.13 ± 1.08             | 0.02 (0.25, 0.29)           | 0.885  | 0.07 (0.11, 0.24)                            | 0.472  |
| HDL-cholesterol,<br>mmol/L                  | 1.80 ± 0.36        | 1.81 ± 0.35             | 0.01 (0.09, 0.10)           | 0.773  | 0.03 (0.03, 0.09)                            | 0.403  |
| LDL-cholesterol,<br>mmol/L                  | 3.30 ± 0.87        | 3.30 ± 0.95             | 0.00 (0.24, 0.24)           | >0.950 | 0.00 (0.19, 0.20)                            | >0.950 |
| Triglyceride, mmol/L                        | 2.23 ± 0.82        | 2.18 ± 0.80             | -0.05 (-0.26, -0.16)        | 0.641  | -0.10 (-0.29, -0.08)                         | 0.263  |
| Fasting glucose,<br>mmol/L                  | 4.49 ± 0.75        | 4.43 ± 0.47             | -0.06 (-0.23, -0.11)        | 0.480  | -0.06 (-0.22, -0.11)                         | 0.517  |
| 1-hour glucose,<br>mmol/L                   | 8.15 ± 2.07        | 7.95 ± 1.75             | -0.20 (-0.71, -0.30)        | 0.427  | -0.21 (-0.72, -0.30)                         | 0.422  |
| 2-hour glucose,<br>mmol/L                   | 6.56 ± 1.77        | 6.69 ± 1.40             | 0.13 (0.29, 0.55)           | 0.554  | 0.14 (0.28, 0.56)                            | 0.517  |
| Gestational diabetes,<br>n (%) <sup>a</sup> |                    |                         |                             | 0.525  |                                              |        |
| No                                          | 95 (80.5)          | 84 (77.1)               |                             |        |                                              |        |
| Yes                                         | 23 (19.5)          | 25 (22.9)               |                             |        |                                              |        |

Data are presented as mean ± standard deviation, unless otherwise indicated. P-values were determined from the Student's t-test, ANCOVA or the chi-Square test, where appropriate. Adjusted for baseline values and duration of intervention, except for glycaemic measures which were only adjusted for intervention duration.

<sup>a</sup>Four declined oral glucose tolerance test (Control: two, Intervention: two). One (control) out of four declined was not diagnosed with gestational diabetes at delivery.

**Table S5.** Comparisons of maternal and birth outcomes between trial groups with ≥80% compliance at delivery.

| Variable                                          | Total (n=182)    | Control (n=98)   | Intervention (n=84) | p     |
|---------------------------------------------------|------------------|------------------|---------------------|-------|
| Neonatal birth weight, grams                      | 3159.73 ± 434.69 | 3116.78 ± 419.51 | 3209.85 ± 449.07    | 0.150 |
| Neonatal birth weight, n (%)                      |                  |                  |                     | 0.695 |
| Neonatal birth length, cm                         | 48.50 ± 2.01     | 48.21 ± 2.04     | 48.82 ± 1.94        | 0.042 |
| Neonatal head circumference, cm                   | 33.83 ± 1.33     | 33.65 ± 1.24     | 34.05 ± 1.40        | 0.042 |
| Neonatal status, n (%)                            |                  |                  |                     | 0.782 |
| Healthy live birth                                | 170 (93.4)       | 92 (93.9)        | 78 (92.9)           |       |
| Special care unit admission                       | 12 (6.6)         | 6 (6.1)          | 6 (7.1)             |       |
| Gestation age at birth, weeks                     | 38.67 ± 1.18     | 38.68 ± 1.07     | 38.66 ± 1.30        | 0.928 |
| Preterm birth, n (%)                              |                  |                  |                     | 0.230 |
| No                                                | 171 (94.0)       | 94 (95.9)        | 77 (91.7)           |       |
| Yes                                               | 11 (6.0)         | 4 (4.1)          | 11 (6.0)            |       |
| Gestational hypertension, n (%) <sup>a</sup>      |                  |                  |                     | 0.688 |
| No                                                | 172 (94.5)       | 92 (93.9)        | 80 (95.2)           |       |
| Yes                                               | 10 (5.5)         | 6 (6.1)          | 4 (4.8)             |       |
| Total gestational weight gain, n (%) <sup>b</sup> |                  |                  |                     | 0.664 |
| Adequacy                                          | 64 (36.4)        | 32 (33.7)        | 32 (39.5)           |       |
| Insufficiency                                     | 39 (22.2)        | 23 (24.2)        | 16 (19.8)           |       |
| Excessive                                         | 73 (41.5)        | 40 (42.1)        | 33 (40.7)           |       |
| Mode of delivery, n (%)                           |                  |                  |                     | 0.880 |
| Normal vaginal delivery                           | 111 (61.0)       | 59 (60.2)        | 52 (61.9)           |       |
| Instrumental (forceps/vacuum)<br>vaginal delivery | 14 (7.7)         | 9 (9.2)          | 5 (6.0)             |       |
| Elective caesarean section<br>delivery            | 23 (12.6)        | 12 (12.2)        | 11 (13.1)           |       |
| Emergency caesarean section<br>delivery           | 34 (18.7)        | 18 (18.4)        | 16 (19.0)           |       |

Data are presented as mean ± standard deviation, unless otherwise indicated. P-values were determined from the Student's t-test or the chi-Square test, where appropriate.

<sup>a</sup>The numbers of participants with pregnancy-induced hypertension and pre-eclampsia are four and six respectively.

<sup>b</sup>Total number is not equal to 182 due to missing data.

**Table S6.** Adverse events and serious adverse events reported.

|                                                     | <b>Total (n=274)</b> | <b>Control (n=137)</b> | <b>Intervention (n=137)</b> |
|-----------------------------------------------------|----------------------|------------------------|-----------------------------|
| Nausea and vomiting, n (%)                          |                      |                        |                             |
| No                                                  | 271 (98.9)           | 136 (99.3)             | 135 (98.5)                  |
| Yes                                                 | 3 (1.1)              | 1 (0.7)                | 2 (1.5)                     |
| Migraine, n (%)                                     |                      |                        |                             |
| No                                                  | 273 (99.6)           | 136 (99.3)             | 137 (100.0)                 |
| Yes                                                 | 1 (0.4)              | 1 (0.7)                | 0 (0.0)                     |
| Hospitalisation for blood glucose monitoring, n (%) |                      |                        |                             |
| No                                                  | 273 (99.6)           | 136 (99.3)             | 137 (100.0)                 |
| Yes                                                 | 1 (0.4)              | 1 (0.7)                | 0 (0.0)                     |
| Placenta previa, n (%)                              |                      |                        |                             |
| No                                                  | 273 (99.6)           | 136 (99.3)             | 137 (100.0)                 |
| Yes                                                 | 1 (0.4)              | 1 (0.7)                | 0 (0.0)                     |
| Hospitalisation for obstetric cholestasis, n (%)    |                      |                        |                             |
| No                                                  | 273 (99.6)           | 136 (99.3)             | 137 (100.0)                 |
| Yes                                                 | 1 (0.4)              | 1 (0.7)                | 0 (0.0)                     |
| Hospitalisation for pre-eclampsia, n (%)            |                      |                        |                             |
| No                                                  | 273 (99.6)           | 136 (99.3)             | 137 (100.0)                 |
| Yes                                                 | 1 (0.4)              | 1 (0.7)                | 0 (0.0)                     |
| Miscarriage, n (%)                                  |                      |                        |                             |
| No                                                  | 268 (97.8)           | 134 (97.8)             | 134 (97.8)                  |
| Yes                                                 | 6 (2.2)              | 3 (2.2)                | 3 (2.2)                     |
| Termination of pregnancy, n (%)                     |                      |                        |                             |
| No                                                  | 272 (99.3)           | 136 (99.3)             | 136 (99.3)                  |
| Yes                                                 | 2 (0.7)              | 1 (0.7)                | 1 (0.7)                     |
